# Supplementary material
Source: HighWire-hosted journal article supplement (https://openres.ersjournals.com/content/8/3/00008-2022)
Supplement: inline-supplementary-material-1 [file inline-supplementary-material-1.pdf]

## Appendix A

Table 1 Standard set of outcome domains and associated measures for patients with COPD accepted by all stakeholders as described in recent research[1]

| Domain                            | Measure                                              | Guided measurement protocol |                |                |
|-----------------------------------|------------------------------------------------------|-----------------------------|----------------|----------------|
|                                   |                                                      | Intake                      | Every 3 months | End            |
|                                   | A: mandatory for all patients with COPD              |                             |                |                |
| Practice/physical therapist level | Characteristics of practices and physical therapists | Once a year                 |                |                |
| Physical capacity                 | 6-Minute Walk Test (6 MWT)                           | X                           | X              | X              |
| Health-related quality of life    | Clinical COPD Questionnaire (CCQ)                    | X                           | X              | X <sup>1</sup> |
| Experience                        | Global Perceived Effect (GPE)                        |                             | X              | X              |
|                                   | B: Conditional measures                              |                             |                |                |
| Quadriceps strength               | Hand-Held Dynamometer (HHD) (with a Microfet™)       | X                           | X              | X              |
| Dyspnea                           | Medical Research Council Dyspnea (MRC)               | X                           | X              | X              |
|                                   | C: Exploratory measures <sup>2</sup>                 |                             |                |                |
| Physical activity                 | Accelerometer (for physical activity in daily life)  |                             |                |                |
| ABC-Tool                          | The Assessment of Burden of COPD tool                |                             |                |                |

<sup>1</sup> After treatment ≥12 months the CCQ needs only to be measured once a year.

<sup>2</sup> The exploratory measures were not included in this study

Table 2 Description of PROMs and physical performance measures

| Patient Reported Outcome Measures (PROMs) and physical performance measures | Description                                                                                                                                                                                                                      |
|-----------------------------------------------------------------------------|----------------------------------------------------------------------------------------------------------------------------------------------------------------------------------------------------------------------------------|
| 6-Minute Walk Test (6 MWT)[2]                                               | Physical performance test where the patients walks for 6 minutes, according to the structured guidelines of Butland et al.[2]                                                                                                    |
| Clinical COPD Questionnaire (CCQ)[3]                                        | The CCQ is an 10 item questionnaire scores the health-related quality of life for patients with COPD, scored on a 7-point Likert scale, score 0 is “very good health status” and 6 “extremely poor health status”                |
| Global Perceived Effect Dutch Version (GPE-DV) [4]                          | This 2-item questionnaire is about patient satisfaction and the patient experienced effect of the treatment on a 7-point likert scale                                                                                            |
| Hand Held Dynamometrie (HHD)[5]                                             | Physical performance test where the patients scores his maximal isometric quadriceps strength                                                                                                                                    |
| Medical Research Council Dyspnea (MRC)[6]                                   | Single item scores the patient experienced symptoms of dyspnoea during physical activity on a 5-point Likert scale, score 1 is “symptoms of dyspnoea during heavy activities” and 5 “to symptoms of dyspnoea to leave the house” |
| The Assessment of Burden of COPD index [7]                                  | A 15 item questionnaire scores the experienced burden of the COPD disease                                                                                                                                                        |
| Accelerometer                                                               | Tool to measure physical activity in daily practice in average steps per day                                                                                                                                                     |
| Characteristics of practices and physical therapist                         | This structure measure scores the education level of the physical therapists and identifies the characteristics of the practice (e.g. equipment’s, training facilities)                                                          |

References:

1. Verburg, A.C., et al., *Development of a Standard Set of Outcome Domains and Proposed Measures for Chronic Obstructive Pulmonary Disease in Primary Care Physical Therapy Practice in the Netherlands: a Modified RAND/UCLA Appropriateness Method*. Int J Chron Obstruct Pulmon Dis, 2019. **14**: p. 2649-2661.
2. Butland, R.J., et al., *Two-, six-, and 12-minute walking tests in respiratory disease*. Br Med J (Clin Res Ed), 1982. **284**(6329): p. 1607-8.
3. van der Molen, T., et al., *Development, validity and responsiveness of the Clinical COPD Questionnaire*. Health Qual Life Outcomes, 2003. **1**: p. 13.
4. Hudak, P.L. and J.G. Wright, *The characteristics of patient satisfaction measures*. Spine (Phila Pa 1976), 2000. **25**(24): p. 3167-77.
5. Desrosiers, J., et al., *Comparison of the Jamar dynamometer and the Martin vigorimeter for grip strength measurements in a healthy elderly population*. Scand J Rehabil Med, 1995. **27**(3): p. 137-43.
6. Fletcher, C.M., *Standardised questionnaire on respiratory symptoms: a statement prepared and approved by the MRC Committee on the Aetiology of Chronic Bronchitis (MRC breathlessness score)*. BMJ 1960. **2**:1665.
7. Slok, A.H., et al., *'To use or not to use': a qualitative study to evaluate experiences of healthcare providers and patients with the assessment of burden of COPD (ABC) tool*. NPJ Prim Care Respir Med, 2016. **26**: p. 16074.
